# Supplementary material
Source: publisher figshare collection journal article supplement (https://acs.figshare.com/ndownloader/files/4096939)

Supplemental Material for Holmes-Hampton et al.

**Figure S1. Mössbauer Spectra (5 K, 0.05 T) showing the contribution of BPS in Fe-deficient Fermenting Cells.** A, BPS-F cells; B,  $[\text{Fe}^{2+}(\text{BPS})_3]^{4-}$ ; C, overlay of A and B at 35% intensity.

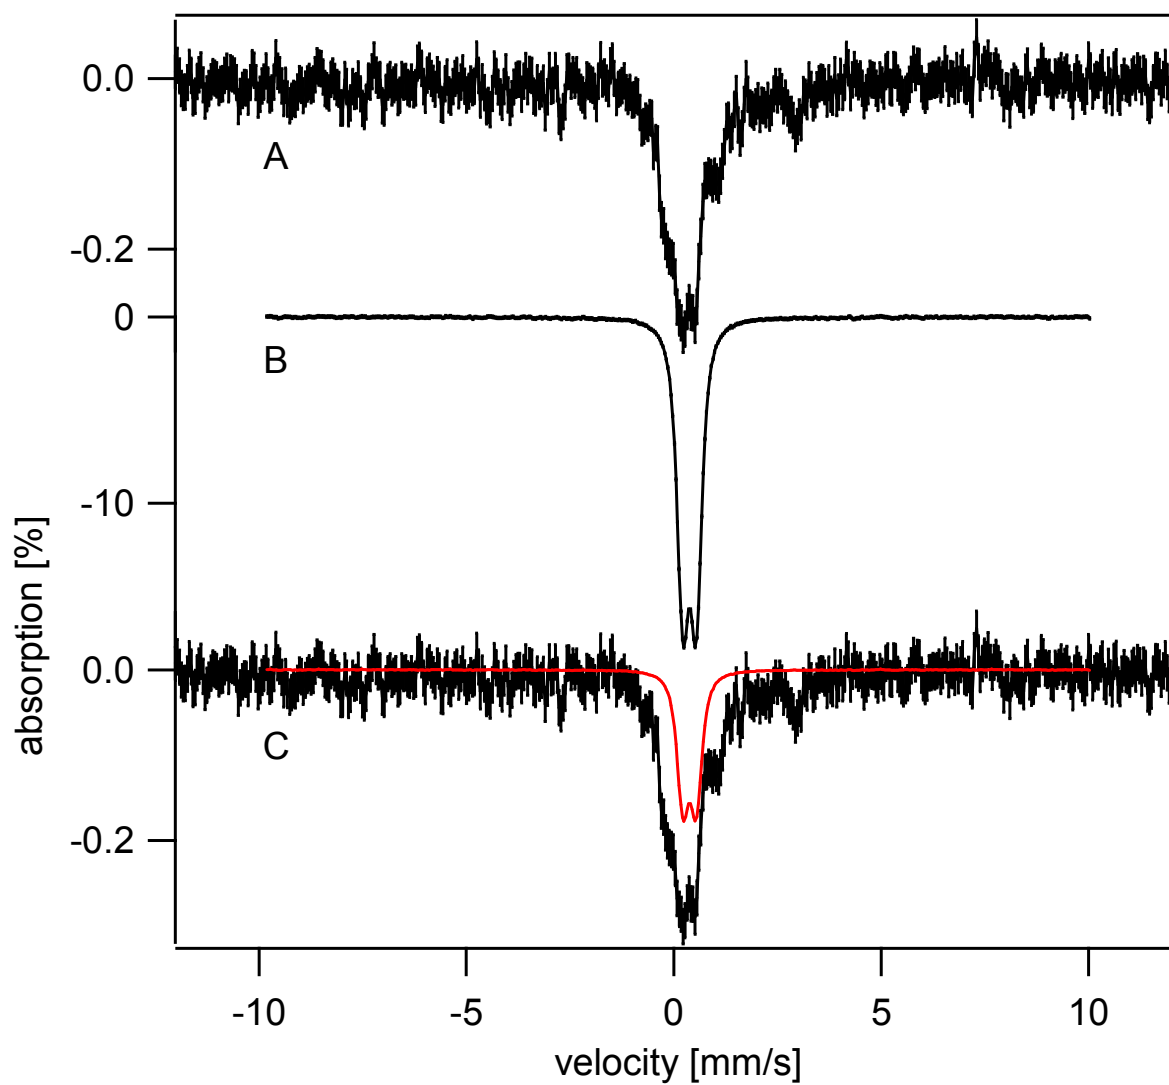

**Figure S2.** Oxyblot analysis of mitochondria isolated from WT fermenting yeast grown with 10  $\mu$ M and 10,000  $\mu$ M of Fe in the medium. Each lane contains 20  $\mu$ g of protein.

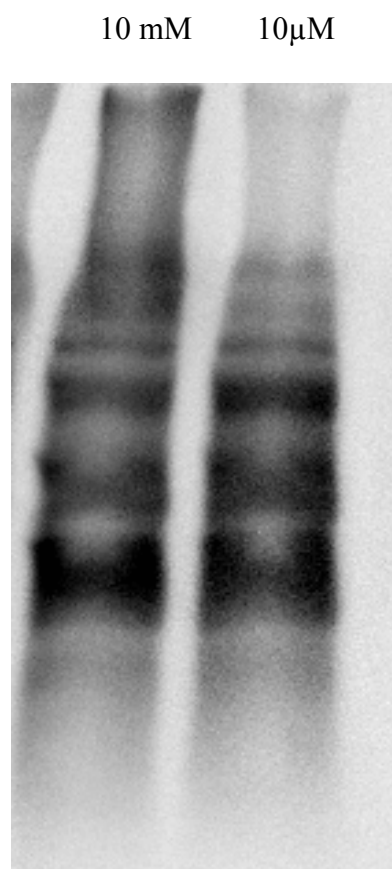

Supplement: Supplementary file 1 [file 4096939]
